# Supplementary material for: Relationship between Physical Activity, Screen Time, and Sleep Quantity and Quality in US Adolescents Aged 16–19
Source: MDPI journal article supplement (doi:10.3390/ijerph16091524), 2019-04-30

**Supplementary Table 1.** Subjects characteristics for those who have data to those who don't have completed data, NHANES 2005-2006

| Variables                            | Total      | With completed data | Without completed data | P-value |
|--------------------------------------|------------|---------------------|------------------------|---------|
|                                      | N=1136     | n=542 (45%)         | n=594 (55%)            |         |
| Age (yrs)                            | 17.4 ± 0.1 | 17.4 ± 0.1          | 17.4 ± 0.1             | 0.575   |
| Race/ethnicity                       |            |                     |                        |         |
| Non-Hispanic White (n%)              | 302 (63.5) | 123 (58.7)          | 179 (67.3)             | 0.198   |
| Non-Hispanic black (n%)              | 395 (15.5) | 202 (17.4)          | 193 (13.8)             |         |
| Mexican American (n%)                | 353 (10.5) | 174 (11.6)          | 179 (9.7)              |         |
| Others (n%)                          | 86 (10.6)  | 43 (12.3)           | 43 (9.2)               |         |
| Parent education                     |            |                     |                        |         |
| High school or less (n%)             | 604 (47.2) | 280 (44.1)          | 324 (50.0)             | 0.068   |
| College or above (n%)                | 453 (52.8) | 235 (55.9)          | 218 (50.0)             |         |
| PIR                                  |            |                     |                        |         |
| PIR below poverty <1 (n%)            | 340 (18.8) | 156 (17.5)          | 184 (19.9)             | 0.369   |
| PIR at or above poverty ≥1 (n%)      | 724 (81.2) | 365 (82.5)          | 359 (80.1)             |         |
| Body Mass Index (kg/m <sup>2</sup> ) | 24.6 ± 0.3 | 24.2 ± 0.4          | 24.9 ± 0.4             | 0.139   |
| Underweight <sup>&amp;</sup> (n%)    | 34 (4.0)   | 14 (2.8)            | 20 (5.0)               | 0.329   |
| Normal or Healthy (n%)               | 656 (62.4) | 338 (65.5)          | 318 (59.8)             |         |
| Overweight (n%)                      | 196 (15.5) | 86 (15.6)           | 110 (15.5)             |         |
| Obese (n%)                           | 244 (18.1) | 103 (16.1)          | 141 (19.6)             |         |

*Note:* means ± standard error for continuous variables and frequencies and proportions for categorical variables; p-values are from PROC SURVEYREG and SURVEYFREQ (CHISQ, based on the Rao-Scott chi-square with an adjusted F statistic); \*p<0.05; PIR=family income to poverty ratio; & underweight < 5th percentile, normal or healthy weight ≥5th percentile and <85th percentile, overweight ≥85th and <95th percentile, obese ≥95th percentile.

**Supplementary Figure 1.** The directed acyclic graph to illustrate the association between covariates and primary exposure and outcomes

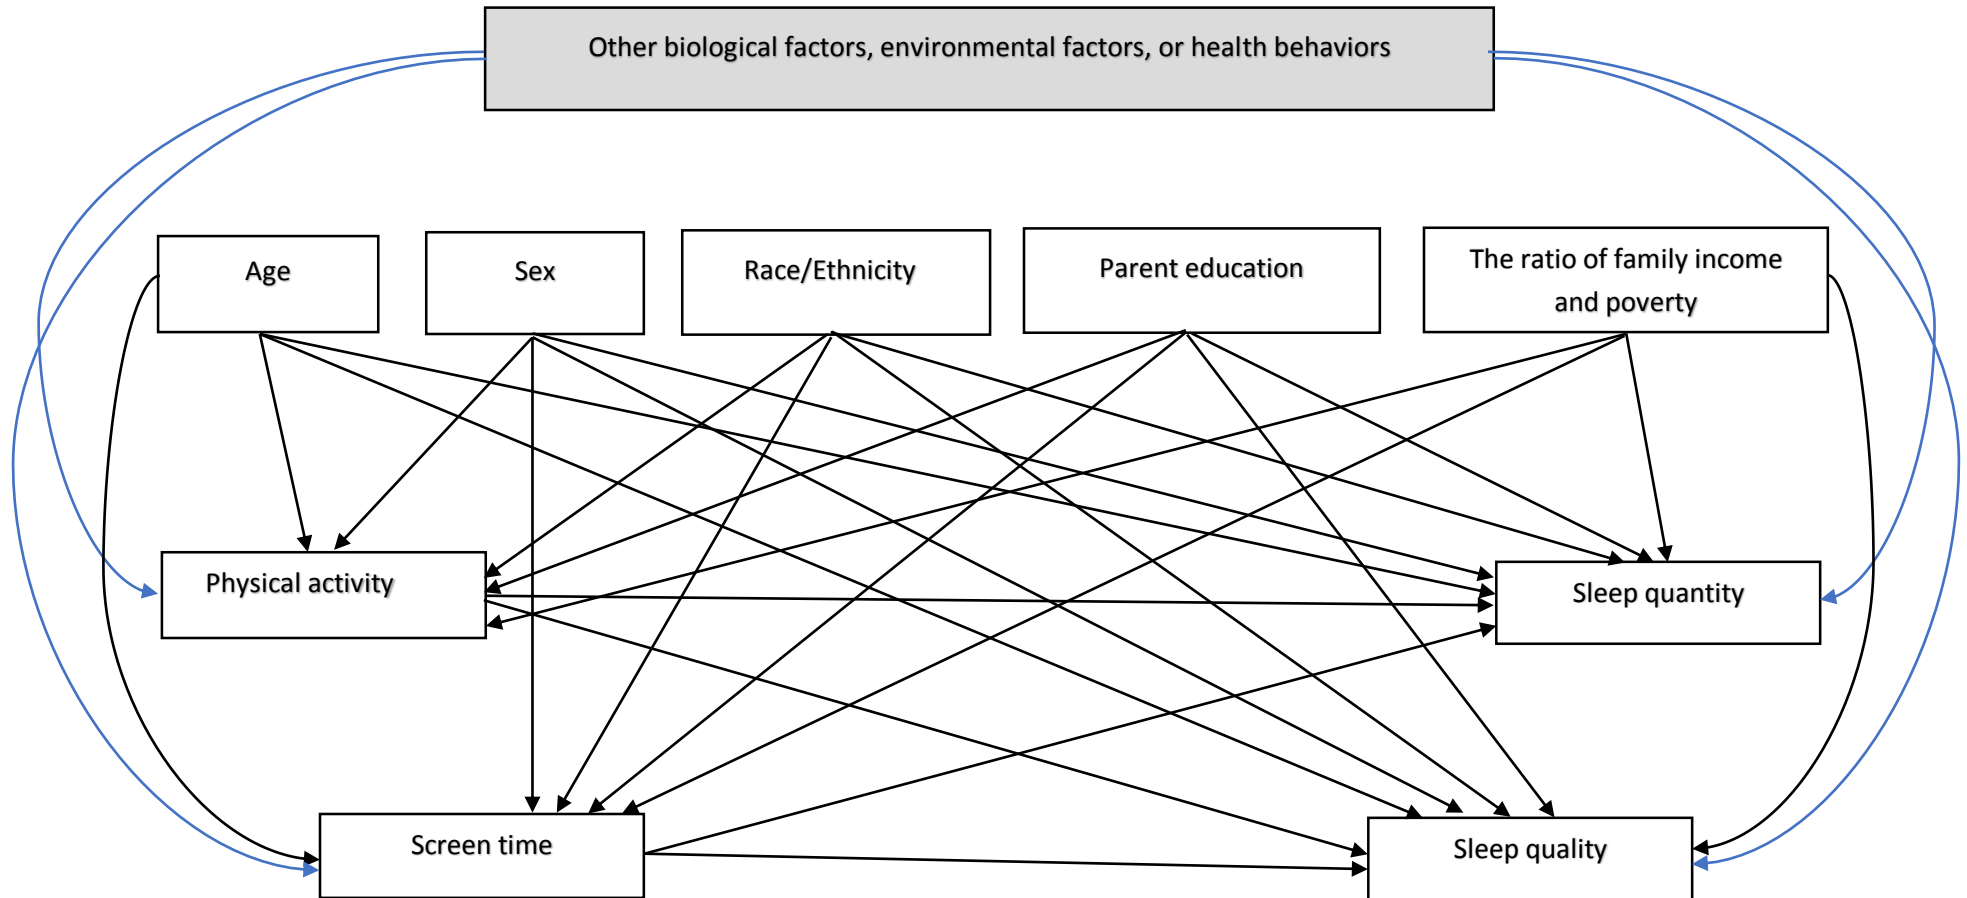

Supplement: s1 [file s1]
